# Supplementary material for: Gene Profiling in Late Blight Resistance in Potato Genotype SD20
Source: PubMed Central journal article supplement (PMC6032139; doi:10.3390/ijms19061728), 2018-06-11
Supplement: ijms-19-01728-s001.pdf [file ijms-19-01728-s001.pdf]

**Table S1.** Differential expressed genes involved in the immune response and HR actions with fold changes of their FPKM ratio (log2FC)

| Annotated Gene       | <i>Ath</i> ID | H <sub>2</sub> O_0h<br>FPKM | H <sub>2</sub> O_24h<br>FPKM | H <sub>2</sub> O_48h<br>FPKM | H <sub>2</sub> O_72h<br>FPKM | CN_0h<br>FPKM | CN_24h<br>FPKM | CN_48h<br>FPKM | CN_72h<br>FPKM | Description                                                |
|----------------------|---------------|-----------------------------|------------------------------|------------------------------|------------------------------|---------------|----------------|----------------|----------------|------------------------------------------------------------|
| PGSC0003DMG400007999 | AT1G33560     | 18.0                        | 50.4                         | 37.4                         | 40.7                         | 20.1          | 67.9           | 122.9          | 143.8          | Nbs-Irr resistance protein                                 |
| PGSC0003DMG400000282 | AT5G56760     | 2.8                         | 3.6                          | 2.9                          | 2.8                          | 2.8           | 3.9            | 6.2            | 7.1            | Serine acetyltransferase 7                                 |
| PGSC0003DMG400000321 | AT3G24503     | 22.5                        | 22.5                         | 23.1                         | 23.1                         | 23.3          | 35.5           | 53.6           | 60.5           | Aldehyde dehydrogenase                                     |
| PGSC0003DMG400000422 | AT2G27920     | 20.7                        | 18.3                         | 23.5                         | 21.1                         | 17.9          | 19.9           | 12.7           | 7.2            | Retinoid-inducible serine carboxypeptidase                 |
| PGSC0003DMG400001096 | AT5G54860     | 6.7                         | 6.5                          | 6.7                          | 6.7                          | 6.4           | 11.4           | 26.0           | 36.0           | Transporter                                                |
| PGSC0003DMG400001470 | AT5G15730     | 6.1                         | 7.0                          | 6.6                          | 6.8                          | 6.1           | 9.6            | 15.0           | 14.1           | Protein-serine/threonine kinase                            |
| PGSC0003DMG400003073 | AT5G46420     | 20.3                        | 14.6                         | 18.1                         | 21.4                         | 19.2          | 12.0           | 9.2            | 5.3            | 16S rRNA processing protein RimM                           |
| PGSC0003DMG400004283 | AT1G28680     | 16.2                        | 20.8                         | 18.7                         | 17.7                         | 15.8          | 36.1           | 31.9           | 41.7           | EIG-I24 protein                                            |
| PGSC0003DMG400004963 | AT5G49660     | 31.5                        | 38.3                         | 36.6                         | 29.0                         | 35.1          | 30.7           | 22.1           | 12.5           | Receptor protein kinase                                    |
| PGSC0003DMG400004966 | AT1G09970     | 9.3                         | 21.0                         | 16.3                         | 15.9                         | 9.2           | 25.2           | 53.7           | 58.8           | Receptor protein kinase CLAVATA1                           |
| PGSC0003DMG400005407 | AT3G06730     | 17.6                        | 10.1                         | 13.4                         | 18.7                         | 14.8          | 9.9            | 7.4            | 3.5            | Thioredoxin-like protein CITRX                             |
| PGSC0003DMG400006084 | AT5G58260     | 29.4                        | 30.4                         | 39.0                         | 37.2                         | 29.2          | 26.2           | 19.4           | 9.5            | Conserved gene of unknown function                         |
| PGSC0003DMG400006800 | NA            | 6.0                         | 5.4                          | 6.3                          | 6.8                          | 7.1           | 6.9            | 3.6            | 2.2            | NBS-LRR protein                                            |
| PGSC0003DMG400007993 | AT2G26530     | 1.4                         | 4.0                          | 3.0                          | 1.6                          | 1.9           | 6.4            | 16.2           | 17.6           | Pheromone receptor                                         |
| PGSC0003DMG400008830 | AT2G37660     | 127.1                       | 96.5                         | 115.0                        | 130.9                        | 114.8         | 87.3           | 67.0           | 27.5           | NAD-dependent epimerase/dehydratase                        |
| PGSC0003DMG400008834 | AT2G37630     | 58.9                        | 45.6                         | 46.9                         | 64.0                         | 58.7          | 46.7           | 29.3           | 7.2            | Phantastica                                                |
| PGSC0003DMG400009004 | AT3G62600     | 29.2                        | 29.7                         | 25.6                         | 28.1                         | 26.8          | 49.5           | 81.4           | 87.5           | Chaperone protein dnaJ                                     |
| PGSC0003DMG400009238 | NA            | 1.1                         | 1.5                          | 1.1                          | 1.3                          | 1.1           | 3.5            | 4.8            | 5.7            | Leucine-rich repeat family protein                         |
| PGSC0003DMG400009317 | AT1G32060     | 515.8                       | 390.2                        | 576.8                        | 555.6                        | 476.8         | 327.9          | 241.6          | 125.4          | Phosphoribulokinase                                        |
| PGSC0003DMG400009380 | AT4G28490     | 10.3                        | 11.7                         | 11.4                         | 10.3                         | 10.8          | 11.3           | 8.1            | 3.7            | Receptor protein kinase CLAVATA1                           |
| PGSC0003DMG400009883 | AT1G76040     | 9.2                         | 10.6                         | 10.3                         | 7.9                          | 8.4           | 12.9           | 30.7           | 31.4           | Calcium-dependent protein kinase                           |
| PGSC0003DMG400009913 | AT1G42480     | 7.0                         | 8.0                          | 6.4                          | 7.5                          | 5.5           | 10.0           | 11.5           | 11.2           | Conserved gene of unknown function                         |
| PGSC0003DMG400010870 | AT2G17040     | 0.9                         | 2.1                          | 2.4                          | 1.1                          | 0.6           | 5.9            | 6.9            | 7.7            | NAC domain protein                                         |
| PGSC0003DMG400011274 | AT1G16670     | 9.0                         | 11.0                         | 10.6                         | 8.7                          | 8.6           | 14.9           | 46.1           | 65.0           | ATP binding protein                                        |
| PGSC0003DMG400012396 | NA            | 12.8                        | 7.0                          | 9.5                          | 17.4                         | 12.5          | 9.0            | 6.0            | 2.1            | Lanceolate                                                 |
| PGSC0003DMG400012875 | NA            | 76.4                        | 86.6                         | 71.4                         | 71.1                         | 67.9          | 133.9          | 163.5          | 197.8          | Protein disulfide isomerase L-2                            |
| PGSC0003DMG400013751 | AT4G03280     | 499.0                       | 478.2                        | 689.1                        | 616.5                        | 439.0         | 417.8          | 303.8          | 172.1          | Cytochrome b6-f complex iron-sulfur subunit, chloroplastic |

| Annotated Gene       | Ath ID    | H <sub>2</sub> O_0h<br>FPKM | H <sub>2</sub> O_24h<br>FPKM | H <sub>2</sub> O_48h<br>FPKM | H <sub>2</sub> O_72h<br>FPKM | CN_0h<br>FPKM | CN_24h<br>FPKM | CN_48h<br>FPKM | CN_72h<br>FPKM | Description                                                  |
|----------------------|-----------|-----------------------------|------------------------------|------------------------------|------------------------------|---------------|----------------|----------------|----------------|--------------------------------------------------------------|
| PGSC0003DMG400014120 | AT2G25110 | 55.5                        | 64.5                         | 56.0                         | 57.2                         | 54.0          | 84.7           | 119.6          | 127.9          | Stromal cell-derived factor 2                                |
| PGSC0003DMG400016641 | AT3G03300 | 8.4                         | 6.2                          | 6.5                          | 7.7                          | 8.1           | 6.3            | 4.4            | 2.4            | ATP binding protein                                          |
| PGSC0003DMG400016959 | AT4G09650 | 360.1                       | 303.0                        | 437.5                        | 384.5                        | 300.5         | 259.3          | 193.4          | 89.1           | ATP synthase delta chain, chloroplastic                      |
| PGSC0003DMG400017252 | AT4G14465 | 3.4                         | 7.5                          | 7.1                          | 5.3                          | 4.8           | 5.8            | 10.5           | 10.7           | DNA binding protein                                          |
| PGSC0003DMG400019363 | AT3G63190 | 107.2                       | 86.6                         | 104.7                        | 120.4                        | 93.8          | 67.2           | 56.3           | 20.6           | Ribosome-recycling factor, chloroplastic                     |
| PGSC0003DMG400019873 | AT3G52430 | 6.2                         | 6.2                          | 6.0                          | 6.3                          | 5.7           | 19.9           | 39.4           | 48.3           | Phytoalexin-deficient 4-2 protein                            |
| PGSC0003DMG400025778 | AT3G19370 | 2.2                         | 3.1                          | 2.8                          | 2.0                          | 2.3           | 5.9            | 12.9           | 13.9           | Myosin heavy chain, fast skeletal muscle, embryonic          |
| PGSC0003DMG400025778 | AT3G19370 | 21.1                        | 19.8                         | 25.3                         | 19.3                         | 20.7          | 16.5           | 10.9           | 2.2            | Myosin heavy chain, fast skeletal muscle, embryonic          |
| PGSC0003DMG400026346 | AT2G27310 | 3.8                         | 52.2                         | 8.6                          | 4.1                          | 7.5           | 19.9           | 61.3           | 93.5           | F-box family protein                                         |
| PGSC0003DMG400027125 | AT3G55800 | 294.3                       | 235.1                        | 336.2                        | 304.0                        | 280.2         | 195.7          | 129.7          | 81.1           | Chloroplast sedoheptulose-1,7-bisphosphatase                 |
| PGSC0003DMG400027523 | AT5G04930 | 2.5                         | 3.3                          | 2.9                          | 2.5                          | 2.4           | 4.9            | 19.7           | 23.0           | Phospholipid-transporting atpase                             |
| PGSC0003DMG400027742 | AT3G55470 | 5.1                         | 8.0                          | 7.1                          | 6.1                          | 5.6           | 10.5           | 26.2           | 31.3           | Elicitor-responsive protein                                  |
| PGSC0003DMG400027797 | NA        | 0.5                         | 0.6                          | 0.5                          | 0.6                          | 0.5           | 1.5            | 2.0            | 2.1            | TIR-NBS-LRR disease resistance                               |
| PGSC0003DMG400028672 | AT3G18690 | 3.9                         | 5.3                          | 3.9                          | 3.8                          | 3.8           | 7.0            | 11.5           | 10.8           | Protein MKS1                                                 |
| PGSC0003DMG400029872 | AT5G46180 | 8.2                         | 9.6                          | 9.5                          | 8.3                          | 7.9           | 11.1           | 18.0           | 38.7           | Ornithine aminotransferase                                   |
| PGSC0003DMG400030010 | AT5G13190 | 21.2                        | 27.6                         | 23.4                         | 24.2                         | 21.9          | 34.9           | 65.0           | 88.4           | Conserved gene of unknown function                           |
| PGSC0003DMG400030058 | AT3G45640 | 13.0                        | 23.3                         | 17.5                         | 16.7                         | 13.6          | 44.4           | 117.5          | 164.6          | MAP kinase                                                   |
| PGSC0003DMG400030612 | NA        | 377.8                       | 256.2                        | 382.5                        | 379.1                        | 362.1         | 220.2          | 153.8          | 64.8           | Serine hydroxymethyl-transferase, mitochondrial              |
| PGSC0003DMG400030812 | NA        | 144.1                       | 176.6                        | 158.3                        | 170.5                        | 147.5         | 341.8          | 925.7          | 956.0          | Phospho-2-dehydro-3-deoxyheptonate aldolase 1, chloroplastic |
| PGSC0003DMG402004425 | NA        | 12.6                        | 10.2                         | 11.8                         | 12.7                         | 12.7          | 11.2           | 8.5            | 4.4            | Cc-nbs-lrr resistance protein                                |

*Ath*, *Arabidopsis thaliana*; FPKM, Fragments per kilobase of exon per million fragments mapped; NA means non-significant orthologous in *Arabidopsis*.

**Table S2.** Primer sequences used for quantitative real-time PCR.

| <b>Gene</b>          | <b>Forward Primer Sequence (5'-3')</b> | <b>Reverse Primer Sequence (5'-3')</b> | <b>Gene Description</b>                        |
|----------------------|----------------------------------------|----------------------------------------|------------------------------------------------|
| PGSC0003DMG400026052 | CAGGAAACAGGGCAACTC                     | ATCACGGCTGGCATAACT                     | AvrPto-dependent Pto-interacting protein 3     |
| PGSC0003DMG400030364 | AACCCTTACCCTAACTCACT                   | CAGAATATCCATCACCTCA                    | Avr9/Cf-9 rapidly elicited protein 284         |
| PGSC0003DMG400015342 | ATGTTTATGCCCATCCTACT                   | TTGATTTCTGTCCCGCT                      | Jasmonic acid 2                                |
| PGSC0003DMG400025481 | ACTTCGTCGGAGAATGGA                     | GTGGGATGTCTGACAACTTC                   | WRKY domain class transcription factor         |
| PGSC0003DMG400034322 | TTATTCAAGTGTAGCGAGTGTC                 | CCCAAAGCCTGTCCAGTT                     | Zinc finger protein                            |
| PGSC0003DMG400032555 | CGAATCATCGGAGTCAAT                     | TTCTGTGGTCTTCGTCCC                     | NAC domain protein                             |
| PGSC0003DMG400006369 | CGTATGAACAATCGCAATCT                   | AGCCCATGATCCTGAACTC                    | AP2/ERF domain-containing transcription factor |
| PGSC0003DMG400007999 | TTATGCCGTTCAAGTGCC                     | ATCTCGGAGAAGTTTGAG                     | Nbs-lrr resistance protein                     |
| PGSC0003DMG400030058 | ATTATCACGATGCCAACC                     | GAAAGCACCCAAGTCCAG                     | MAP kinase                                     |
| PGSC0003DMG400003043 | ACGCAACAACGTCCATAC                     | AGACTCCACCACAATCACC                    | Osmotin                                        |
| GAPDH                | CTGGTGCTGACTTCGTCG                     | CTGGCTTGTATTTCATTCTCG                  | Internal reference gene                        |
